# Supplementary material for: Malignant transformation of bronchiole adenoma into invasive mucinous adenocarcinoma: a case report and literature review
Source: Research Square preprint supplement (doi:10.21203/rs.3.rs-1543427/v1), 2022-04-13
Supplement: Supplementary file 1 [file 79142abbabc2c9d986849be8.xls]

## Sheet: Sheet1
Table 1. Clinicopathological features of the malignant transformation of BA/CMPT
Studies	Age/Gender	Size(mm)	Location	Diagnosis	Malignant transformation	Gene mutation
Miyai(2018)[12]	67/F	20	Middle lobe of right lung	CMPT	Invasive spindle cell carcinoma	/
Chen(2021)[15]	61/M	14	Inferior lobe of right lung	CMPT	MA	-
Han(2021)[14]	70/M	15	Middle lobe of right lung	BA	MA	KRAS (G12V)
Wang(2021)[13]	67/F	7	Dorsal segment of left lung	BA	Adenocarcinoma	CCNE1, HER2
Present case	56/F	17	Inferior lobe of left lung	BA	MA	/
F, female; M, male; “-” , no mutation detected; “/”, not detected; CMPT, ciliated muconodular papillary tumors; BA, Bronchiole adenoma; MA, mucinous adenocarcinoma.
